# Supplementary material for: Computational and experimental analysis of Ba0.95La0.05FeO3−δ as a cathode material for solid oxide fuel cells
Source: Royal Society of Chemistry journal article supplement (doi:10.1039/c4ta01593b), 2014-01-01
Supplement: c4ta01593b1.pdf [file c4ta01593b1.pdf]

## *Supplementary Information*

# **Computational and Experimental Analysis of $\text{Ba}_{0.95}\text{La}_{0.05}\text{FeO}_{3-\delta}$ as a Cathode Material for Solid Oxide Fuel Cells**

Chi Chen,<sup>a</sup> Dengjie Chen,<sup>a</sup> Yang Gao,<sup>a</sup> Zongping Shao<sup>c,d</sup> and Francesco Ciucci<sup>a,b\*</sup>

<sup>a</sup> Department of Mechanical and Aerospace Engineering, The Hong Kong University of Science and Technology, Hong Kong, SAR China. Tel: +852 2358 7187; E-mail: mefrank@ust.hk

<sup>b</sup> Department of Chemical and Biomolecular Engineering, The Hong Kong University of Science and Technology, Hong Kong, SAR China

<sup>c</sup> College of Energy, Nanjing University of Technology, No. 5 Xin Mofan Road, Nanjing 210009, PR China

<sup>d</sup> Department of Chemical Engineering, Curtin University, Perth, WA 6845, Australia

This supplementary information contains 3 sections. Section 1 lists the potential parameters used in the manuscripts as well as the reference for each potential parameter. Section 2 contains the information of the temperature fluctuations that are observed in our MD simulation. The last section is about the MD method we used to compute the Poisson's ratio.

### **1. The potential parameters**

The Buckingham potential is used in the paper, which adopts the following analytic form.

$$\Phi_{\alpha\beta} = \frac{Z_{\alpha}Z_{\beta}e^2}{4\pi\epsilon r_{\alpha\beta}} + A_{\alpha\beta} \exp\left(-\frac{r_{\alpha\beta}}{\rho_{\alpha\beta}}\right) - \frac{C_{\alpha\beta}}{r_{\alpha\beta}^6} \quad (1)$$

The parameters for each ionic pair are obtained from the references, as detailed in

**Table S1.**

**Table S1.** The potential parameters for the Buckingham pairwise potential.

| Ion pairs                               | $A_{\alpha\beta} / \text{eV}$ | $\rho_{\alpha\beta} / \text{nm}$ | $C_{\alpha\beta} / \text{eV}\text{\AA}^6$ | Ref. |
|-----------------------------------------|-------------------------------|----------------------------------|-------------------------------------------|------|
| $\text{O}^{2-}\text{---}\text{O}^{2-}$  | 22764.3                       | 0.1490                           | 43.00                                     | [1]  |
| $\text{Ba}^{2+}\text{---}\text{O}^{2-}$ | 1214.4                        | 0.3522                           | 0                                         | [1]  |
| $\text{Fe}^{3+}\text{---}\text{O}^{2-}$ | 1156.36                       | 0.3299                           | 0                                         | [1]  |
| $\text{La}^{3+}\text{---}\text{O}^{2-}$ | 1439.7                        | 0.3651                           | 0                                         | [2]  |
|                                         | 2051.32                       | 0.3459                           | 15.51                                     | [3]  |
|                                         | 1545.21                       | 0.3590                           | 0                                         | [4]  |
|                                         | 1439.7                        | 0.3661                           | 0                                         | [5]  |
|                                         | 2088.79                       | 0.3460                           | 23.25                                     | [6]  |
| $\text{Y}^{3+}\text{---}\text{O}^{2-}$  | 1766.40                       | 0.33849                          | 19.43                                     | [7]  |
| $\text{Gd}^{3+}\text{---}\text{O}^{2-}$ | 1885.75                       | 0.3399                           | 20.34                                     | [7]  |
| $\text{Sm}^{3+}\text{---}\text{O}^{2-}$ | 1944.44                       | 0.3414                           | 21.49                                     | [7]  |

## 2. Fluctuations of molecular dynamics simulation using NPT ensemble

The fluctuations of molecular dynamics simulation using NPT ensemble are quantified by monitoring the temperature. Figure S1 shows the temperature fluctuations at different target temperatures. For the simulation cases with  $T = 1173, 1273, 1373, 1473$  and  $1573$  K, the average temperatures, denoted by  $\mu$ , matched well with the target temperatures, while the fluctuations, reflected by the standard deviation  $\sigma$ , are less than 5% of the target temperature, indicating that well-converged

simulations are obtained.

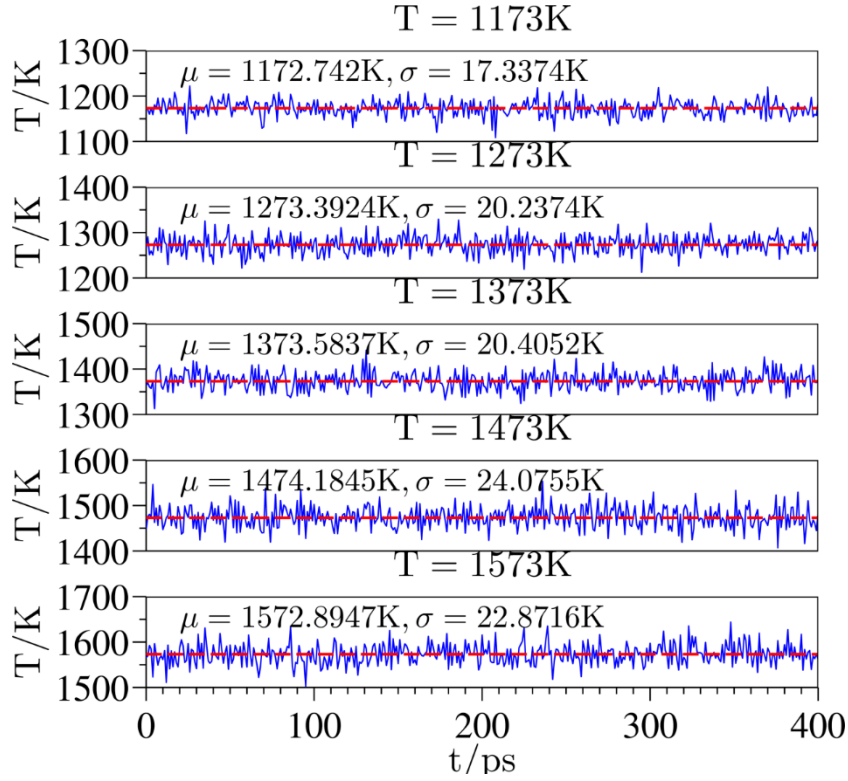

**Figure S1.** Temperature fluctuations of molecular dynamics simulation.

### 3. Calculate the Poisson's ratio

The calculation is implemented in LAMMPS. Besides the conditions mentioned in the main text, the system is modeled by applying a constant uniaxial tensile strain, with a strain rate of  $2 \times 10^{-2}/\text{ps}$ , for 10 ps (10000 steps). The method is similar to that described in the LAMMPS tutorial page [8]. Once the system is deformed, the engineering strain of each dimension can be measured. The Poisson's ratio is calculated by the equation:

$$\varepsilon_y = -\nu\varepsilon_x \quad (2)$$

where  $\varepsilon_x$  is the strain of the loading direction and  $\varepsilon_y$  is the transverse direction.

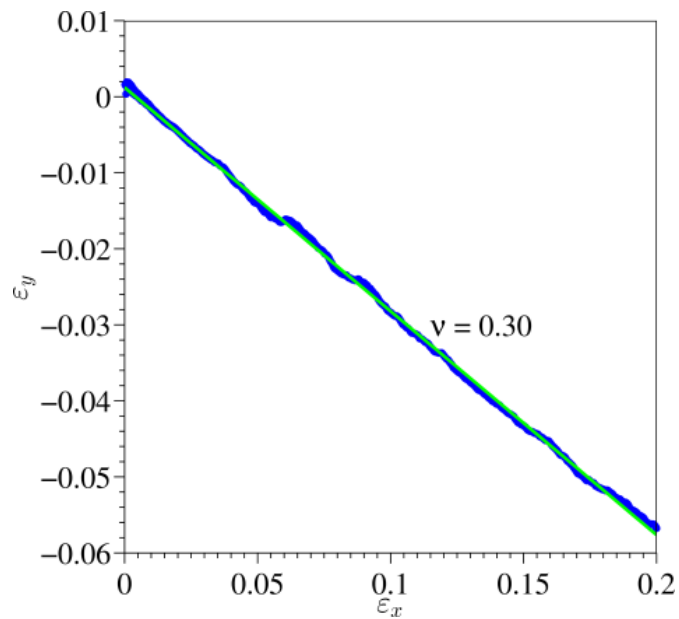

## References

1. H. Shiiba, C. L. Bishop, M. J. Rushton, M. Nakayama, M. Nogami, J. A. Kilner and R. W. Grimes, *J. Mater. Chem. A*, 2013, 1, 10345-10352.
2. M. T. Buscaglia, V. Buscaglia, M. Viviani and P. Nanni, *J. Am. Ceram. Soc.*, 2001, 84, 376-384.
3. M. R. Levy, R. W. Grimes and K. E. Sickafus, *Philos. Mag.*, 2004, 84, 533-545.
4. R. A. De Souza, M. S. Islam and E. Ivers-Tiffée, *J. Mater. Chem.*, 1999, 9, 1621-1627.
5. E. Béchade, O. Masson, T. Iwata, I. Julien, K. Fukuda, P. Thomas and E. Champion, *Chem. Mater.*, 2009, 21, 2508-2517.
6. L. Minervini, M. O. Zacate and R. W. Grimes, *Solid State Ionics*, 1999, 116, 339-349.
7. D. R. Ou, F. Ye and T. Mori, *Phys. Chem. Chem. Phys.*, 2011, 13, 9554-9560.
8. [https://icme.hpc.msstate.edu/mediawiki/index.php/Uniaxial\\_Tension](https://icme.hpc.msstate.edu/mediawiki/index.php/Uniaxial_Tension)
